# Supplementary material
Source: publisher figshare collection journal article supplement (https://rs.figshare.com/ndownloader/files/20065754)
Supplement: Supplementary file 1 [file 20065754]

## Sheet: Sheet2
row	FileNames	throw.id	recording.level	TreeID	Latin name	dbh	throw.target	ASTspecies.yn	Impactor	Impactor.Type	Impactor.weight.kg	AttackTime	SpectralCentroid	Damping
1	1004_BoeSite1_SI1_3_AKG.wav	throw14	three	ASTGUILE	tre afr	60	buttress	yes	SI1	igneous	3	0.00147917	1172.63	-46.7737
2	1004_BoeSite1_SI1_4_AKG.wav	throw15	four	ASTGUILE	tre afr	60	buttress	yes	SI1	igneous	3	0.00485417	2521.06	-79.8353
3	1004_BoeSite1_SI2_3_AKG.wav	throw16	three	ASTGUILE	tre afr	60	buttress	yes	SI2	laterite	3	0.0018125	1952.58	-56.2741
4	1004_BoeSite1_SI2_4_AKG.wav	throw17	four	ASTGUILE	tre afr	60	buttress	yes	SI2	laterite	3	0.00541667	1075.42	-56.1065
5	1004_BoeSite1b_SI2_3_AKG.wav	throw18	three	ASTGUILE	tre afr	60	buttress	yes	SI2	laterite	3	0.00975	2790.62	-96.9008
6	1004_BoeSite1b_SI2_4_AKG.wav	throw19	four	ASTGUILE	tre afr	60	buttress	yes	SI2	laterite	3	0.0063125	2408.45	-46.6831
7	1005_BoeSite1c_SI1_4_AKG.wav	throw20	four	ASTGUILE	tre afr	60	hollow	yes	SI1	igneous	3	0.0055625	4437.55	-66.5659
8	1005_BoeSite1c_SI2_3_AKG.wav	throw21	three	ASTGUILE	tre afr	60	hollow	yes	SI2	laterite	3	0.000979167	7090.3	-46.2669
9	1005_BoeSite1c_SI2_4_AKG.wav	throw22	four	ASTGUILE	tre afr	60	hollow	yes	SI2	laterite	3	0.00504167	2602.43	-67.384
10	1006_BoeSite2_SI1_3_AKG.wav	throw23	three	Banta1	cei pen	320	buttress	yes	SI1	igneous	3	0.00885417	5849.79	-81.5608
11	1006_BoeSite2_SI1_4_AKG.wav	throw24	four	Banta1	cei pen	320	buttress	yes	SI1	igneous	3	0.00908333	5627.88	-32.08
12	1006_BoeSite2_SI2_3_AKG.wav	throw25	three	Banta1	cei pen	320	buttress	yes	SI2	laterite	3	0.009625	3482.2	-82.7218
13	1006_BoeSite2_SI2_4_AKG.wav	throw26	four	Banta1	cei pen	320	buttress	yes	SI2	laterite	3	0.00533333	4419.39	-73.7115
14	1007_BoeSite3_SI1_3_AKG.wav	throw27	three	Banta2	cei pen	360	buttress	yes	SI1	igneous	3	0.006625	5000.42	-55.9062
15	1007_BoeSite3_SI1_4_AKG.wav	throw28	four	Banta2	cei pen	360	buttress	yes	SI1	igneous	3	0.00566667	4924.05	-69.8396
16	1007_BoeSite3_SI2_3_AKG.wav	throw29	three	Banta2	cei pen	360	buttress	yes	SI2	laterite	3	0.00414583	4762.33	-82.3339
17	1007_BoeSite3_SI2_4_AKG.wav	throw30	four	Banta2	cei pen	360	buttress	yes	SI2	laterite	3	0.0028125	4179.61	-38.6207
18	1008_BoeSite4_SI1_3_AKG.wav	throw31	three	TabaASTOLD	col cor	88	buttress	yes	SI1	igneous	3	0.00220833	1148.17	-40.6845
19	1008_BoeSite4_SI2_4_AKG.wav	throw32	four	TabaASTOLD	col cor	88	buttress	yes	SI2	laterite	3	0.0127083	2298.56	-31.0425
20	1009_BoeSite5_SI1_3_AKG.wav	throw33	three	Kai1	kha sen	110	trunk	no	SI1	igneous	3	0.00239583	5341.55	-196.775
21	1009_BoeSite5_SI1_4_AKG.wav	throw34	four	Kai1	kha sen	110	trunk	no	SI1	igneous	3	0.000541667	7047.86	-144.978
22	1009_BoeSite5_SI2_3_AKG.wav	throw35	three	Kai1	kha sen	110	trunk	no	SI2	laterite	3	0.00295833	6851.26	-218.918
23	1009_BoeSite5_SI2_4_AKG.wav	throw36	four	Kai1	kha sen	110	trunk	no	SI2	laterite	3	0.0030625	4687.14	-144.969
24	1010_BoeSite6_SI1_3_AKG.wav	throw37	three	Taba2	col cor	122	trunk	yes	SI1	igneous	3	0.00408333	3352.8	-87.4041
25	1010_BoeSite6_SI1_4_AKG.wav	throw38	four	Taba2	col cor	122	trunk	yes	SI1	igneous	3	0.0059375	4858.93	-87.8402
26	1010_BoeSite6_SI2_3_AKG.wav	throw39	three	Taba2	col cor	122	trunk	yes	SI2	laterite	3	0.00545833	4674.76	-107.293
27	1010_BoeSite6_SI2_4_AKG.wav	throw40	four	Taba2	col cor	122	trunk	yes	SI2	laterite	3	0.00397917	3478.46	-87.1636
28	1011_BoeSite7_SI1_3_AKG.wav	throw41	three	Telle1	ery gui	100	trunk	no	SI1	igneous	3	0.00416667	7274.93	-115.21
29	1011_BoeSite7_SI1_4_AKG.wav	throw42	four	Telle1	ery gui	100	trunk	no	SI1	igneous	3	0.00108333	6292.71	-116.315
30	1011_BoeSite7_SI2_3_AKG.wav	throw43	three	Telle1	ery gui	100	trunk	no	SI2	laterite	3	0.00360417	7818.83	-168.949
31	1011_BoeSite7_SI2_4_AKG.wav	throw44	four	Telle1	ery gui	100	trunk	no	SI2	laterite	3	0.00104167	6692.37	-129.063
32	1012_BoeSite8_SI1_3_AKG.wav	throw45	three	ASTCROSS1	cro feb	39	hollow	yes	SI1	igneous	3	0.0053125	1852.82	-111.897
33	1012_BoeSite8_SI1_4_AKG.wav	throw46	four	ASTCROSS1	cro feb	39	hollow	yes	SI1	igneous	3	0.00460417	3517.44	-95.7116
34	1012_BoeSite8_SI2_3_AKG.wav	throw47	three	ASTCROSS1	cro feb	39	hollow	yes	SI2	laterite	3	0.008875	3772.99	-38.2948
35	1012_BoeSite8_SI2_4_AKG.wav	throw48	four	ASTCROSS1	cro feb	39	hollow	yes	SI2	laterite	3	0.002125	3277.31	-148.791
36	1012_BoeSite8_chimpstone_3_AKG.wav	throw49	three	ASTCROSS1	cro feb	39	hollow	yes	chimpstoneA	laterite	8.5	0.00454167	2254.16	-299.161
37	1012_BoeSite8_chimpstone_4_AKG.wav	throw50	four	ASTCROSS1	cro feb	39	hollow	yes	chimpstoneA	laterite	8.5	0.00177083	2359.56	-124.52
38	1013_BoeSite9_SI1_4_AKG.wav	throw51	four	Duki1	cor pin	60	trunk	no	SI1	igneous	3	0.00185417	7470.17	-231.339
39	1013_BoeSite9_SI2_3_AKG.wav	throw52	three	Duki1	cor pin	60	trunk	no	SI2	laterite	3	0.0015	6982.72	-243.248
40	1013_BoeSite9_SI2_4_AKG.wav	throw53	four	Duki1	cor pin	60	trunk	no	SI2	laterite	3	0.00235417	7541.16	-114.265
41	1014_BoeSite10_SI1_4_AKG.wav	throw54	four	Parkia1	par big	78	trunk	no	SI1	igneous	3	0.00672917	5208.37	-82.1845
42	1014_BoeSite10_SI2_3_AKG.wav	throw55	three	Parkia1	par big	78	trunk	no	SI2	laterite	3	0.0011875	4712.32	-104.014
43	1014_BoeSite10_SI2_4_AKG.wav	throw56	four	Parkia1	par big	78	trunk	no	SI2	laterite	3	0.00152083	3474.38	-102.21
44	1015_BoeSite11_SI1_3_AKG.wav	throw57	three	Telle2	ery gui	65	trunk	no	SI1	igneous	3	0.001125	8300.95	-174.6
45	1015_BoeSite11_SI1_4_AKG.wav	throw58	four	Telle2	ery gui	65	trunk	no	SI1	igneous	3	0.000416667	5897.12	-219.586
46	1015_BoeSite11_SI2_3_AKG.wav	throw59	three	Telle2	ery gui	65	trunk	no	SI2	laterite	3	0.0018125	6216.58	-136.605
47	1015_BoeSite11_SI2_4_AKG.wav	throw60	four	Telle2	ery gui	65	trunk	no	SI2	laterite	3	0.000645833	6958.43	-143.885
48	1016_BoeSite12_SI1_3_AKG.wav	throw61	three	ASTCROSS2	cro feb	37	trunk	yes	SI1	igneous	3	0.00114583	1540.97	-232.16
49	1016_BoeSite12_SI2_3_AKG.wav	throw62	three	ASTCROSS2	cro feb	37	trunk	yes	SI2	laterite	3	0.0014375	1632.23	-80.7571
50	1016_BoeSite12_SI2_4_AKG.wav	throw63	four	ASTCROSS2	cro feb	37	trunk	yes	SI2	laterite	3	0.00147917	2237.92	-180.177
51	1016_BoeSite12_chimpstone2_3_AKG.wav	throw64	three	ASTCROSS2	cro feb	37	trunk	yes	chimpstoneB	laterite	6	0.00202083	1257.73	-73.2738
52	1016_BoeSite12_chimpstone2_4_AKG.wav	throw65	four	ASTCROSS2	cro feb	37	trunk	yes	chimpstoneB	laterite	6	0.0015625	1461.83	-78.7924
53	1016_BoeSite12_chimpstone_3_AKG.wav	throw66	three	ASTCROSS2	cro feb	37	trunk	yes	chimpstoneC	laterite	3.5	0.0014375	1119.16	-85.58
54	1016_BoeSite12_chimpstone_4_AKG.wav	throw67	four	ASTCROSS2	cro feb	37	trunk	yes	chimpstoneC	laterite	3.5	0.00127083	2003.65	-32.2841
55	1017_BoeSite12B_SI1_3_AKG.wav	throw68	three	ASTCROSS2	cro feb	37	trunk	yes	SI1	igneous	3	0.0040625	2189.98	-138.681
56	1017_BoeSite12B_SI1_4_AKG.wav	throw69	four	ASTCROSS2	cro feb	37	trunk	yes	SI1	igneous	3	0.0038125	2106.58	-131.651
57	1017_BoeSite12B_SI2_3_AKG.wav	throw70	three	ASTCROSS2	cro feb	37	trunk	yes	SI2	laterite	3	0.00320833	2626.28	-140.042
58	1017_BoeSite12B_SI2_4_AKG.wav	throw71	four	ASTCROSS2	cro feb	37	trunk	yes	SI2	laterite	3	0.00229167	1235.23	-170.272
59	1017_BoeSite12B_chimpstone2_3_AKG.wav	throw72	three	ASTCROSS2	cro feb	37	trunk	yes	chimpstoneC	laterite	3.25	0.00358333	2046.84	-104.642
60	1017_BoeSite12B_chimpstone2_4_AKG.wav	throw73	four	ASTCROSS2	cro feb	37	trunk	yes	chimpstoneC	laterite	3.25	0.00139583	3484.5	-61.2062
61	1017_BoeSite12B_chimpstone_3_AKG.wav	throw74	three	ASTCROSS2	cro feb	37	trunk	yes	chimpstoneB	laterite	6	0.003625	2213.2	-147.724
62	1017_BoeSite12B_chimpstone_4_AKG.wav	throw75	four	ASTCROSS2	cro feb	37	trunk	yes	chimpstoneB	laterite	6	0.00352083	2204.58	-137.308
63	1017_BoeSite12C_chimpstone2_3_AKG.wav	throw76	three	ASTCROSS2	cro feb	37	hollow	yes	chimpstoneC	laterite	3.25	0.00166667	1337.05	-78.3732
64	1017_BoeSite12C_chimpstone2_4_AKG.wav	throw77	four	ASTCROSS2	cro feb	37	hollow	yes	chimpstoneC	laterite	3.25	0.00102083	1663.6	-90.3541
65	1017_BoeSite12C_chimpstone_3_AKG.wav	throw78	three	ASTCROSS2	cro feb	37	hollow	yes	chimpstoneB	laterite	6	0.00491667	1339.38	-184.113
66	1018_BoeSite13_SI2_3_AKG.wav	throw79	three	ASTBANI1	pte eri	57	buttress	yes	SI2	laterite	3	0.0013125	940.378	-59.5145
67	1019_BoeSite14_SI2_3_AKG.wav	throw80	three	ASTBOM3	bom cos	100	buttress	yes	SI2	laterite	3	0.0071875	3611.65	-28.4793
68	1019_BoeSite14_SI2_4_AKG.wav	throw81	four	ASTBOM3	bom cos	100	buttress	yes	SI2	laterite	3	0.00629167	5164.3	-34.9584
69	1019_BoeSite14_SI3_3_AKG.wav	throw82	three	ASTBOM3	bom cos	100	buttress	yes	SI3	igneous	3	0.0100208	4939.5	-35.7512
70	1019_BoeSite14_chimpstone_3_AKG.wav	throw83	three	ASTBOM3	bom cos	100	buttress	yes	chimpstoneD	laterite	2.25	0.00735417	3578.32	-26.1857
71	1019_BoeSite14_chimpstone_4_AKG.wav	throw84	four	ASTBOM3	bom cos	100	buttress	yes	chimpstoneD	laterite	2.25	0.007	2056.73	-28.8643
72	1020_BoeSite15_SI2_3_AKG.wav	throw85	three	Duki2	cor pin	50	trunk	no	SI2	laterite	3	0.00379167	5925.72	-226.387
73	1020_BoeSite15_SI3_4_AKG.wav	throw86	four	Duki2	cor pin	50	trunk	no	SI3	igneous	3	0.00583333	8621.17	-43.7495
74	1021_BoeSite16_SI2_3_AKG.wav	throw87	three	Boto1	det sen	80	trunk	no	SI2	laterite	3	0.0030625	5244.1	-193.245
75	1021_BoeSite16_SI2_4_AKG.wav	throw88	four	Boto1	det sen	80	trunk	no	SI2	laterite	3	0.00310417	5232.9	-137.386
76	1021_BoeSite16_SI3_4_AKG.wav	throw89	four	Boto1	det sen	80	trunk	no	SI3	igneous	3	0.00214583	6253.18	-171.864
77	1022_BoeSite17_SI2_3_AKG.wav	throw90	three	Parkia2	par big	65	trunk	no	SI2	laterite	3	0.002625	4646.76	-60.0558
78	1022_BoeSite17_SI2_4_AKG.wav	throw91	four	Parkia2	par big	65	trunk	no	SI2	laterite	3	0.000979167	5191.78	-93.7371
79	1022_BoeSite17_SI3_3_AKG.wav	throw92	three	Parkia2	par big	65	trunk	no	SI3	igneous	3	0.00147917	4179.13	-142.594
80	1022_BoeSite17_SI3_4_AKG.wav	throw93	four	Parkia2	par big	65	trunk	no	SI3	igneous	3	0.00247917	6897.73	-107.811
81	1023_BoeSite18_SI3_4_AKG.wav	throw95	four	Dani1	dan oli	95	trunk	no	SI3	igneous	3	0.000895833	5516.72	-114.586
82	1023_BoeSite18_SI2_4_AKG.wav	throw96	four	Dani1	dan oli	95	trunk	no	SI2	laterite	3	0.0013125	4763.27	-102.89
83	1023_BoeSite18_SI3_3_AKG.wav	throw97	three	Dani1	dan oli	95	trunk	no	SI3	igneous	3	0.0011875	4857.6	-125.81
84	1024_BoeSite19_SI2_4_AKG.wav	throw98	four	Dani2	dan oli	105	trunk	no	SI2	laterite	3	0.00145833	6616.93	-204.103
85	1024_BoeSite19_SI3_3_AKG.wav	throw99	three	Dani2	dan oli	105	trunk	no	SI3	igneous	3	0.0023125	5031.89	-215.28
86	1025_BoeSite20_SI2_3_AKG.wav	throw100	three	ASTBOM1	bom cos	40	buttress	yes	SI2	laterite	3	0.00533333	3259.02	-16.7566
87	1025_BoeSite20_SI2_4_AKG.wav	throw101	four	ASTBOM1	bom cos	40	buttress	yes	SI2	laterite	3	0.00572917	2462.62	-17.7951
88	1025_BoeSite20_SI3_3_AKG.wav	throw102	three	ASTBOM1	bom cos	40	buttress	yes	SI3	igneous	3	0.00529167	5257.5	-69.4729
89	1025_BoeSite20_SI3_4_AKG.wav	throw103	four	ASTBOM1	bom cos	40	buttress	yes	SI3	igneous	3	0.00479167	4449.51	-91.2475
90	1025_BoeSite20_chimpstone_3_AKG.wav	throw104	three	ASTBOM1	bom cos	40	buttress	yes	chimpstoneE	laterite	3.25	0.00977083	4650.9	-13.1969
91	1025_BoeSite20_chimpstone_4_AKG.wav	throw105	four	ASTBOM1	bom cos	40	buttress	yes	chimpstoneE	laterite	3.25	0.00489583	3585.71	-71.8831
92	1026_BoeSite20B_SI3_3_AKG.wav	throw106	three	ASTBOM1	bom cos	40	trunk	yes	SI3	igneous	3	0.00441667	6474.63	-47.1922
93	1027_BoeSite21_SI2_3_AKG.wav	throw107	three	ASTBANI2	pte eri	80	buttress	yes	SI2	laterite	3	0.00839583	3118.42	-19.8292
94	1027_BoeSite21_SI2_4_AKG.wav	throw108	four	ASTBANI2	pte eri	80	buttress	yes	SI2	laterite	3	0.00104167	2709.25	-31.5586
95	1027_BoeSite21_SI3_3_AKG.wav	throw109	three	ASTBANI2	pte eri	80	buttress	yes	SI3	igneous	3	0.00675	4994.56	-42.9363
96	1027_BoeSite21_SI3_4_AKG.wav	throw110	four	ASTBANI2	pte eri	80	buttress	yes	SI3	igneous	3	0.00425	3548.77	-28.2024
97	1027_BoeSite21_chimpstone_3_AKG.wav	throw111	three	ASTBANI2	pte eri	80	buttress	yes	chimpstoneF	laterite	3.75	0.006125	2698	-54.3087
98	1027_BoeSite21_chimpstone_4_AKG.wav	throw112	four	ASTBANI2	pte eri	80	buttress	yes	chimpstoneF	laterite	3.75	0.0013125	2609.97	-82.4202
99	1028_BoeSite21B_SI2_3_AKG.wav	throw113	three	ASTBANI2	pte eri	80	trunk	yes	SI2	laterite	3	0.00210417	5874.5	-58.7627
100	1028_BoeSite21B_SI3_3_AKG.wav	throw114	three	ASTBANI2	pte eri	80	trunk	yes	SI3	igneous	3	0.0034375	6530.39	-164.174
101	1028_BoeSite21B_chimpstone_4_AKG.wav	throw115	four	ASTBANI2	pte eri	80	trunk	yes	chimpstoneF	laterite	3.75	0.00210417	4793.91	-38.8809
102	1030_BoeSite22_SI3_3_AKG.wav	throw116	three	ASTPAR	par exc	155	trunk	no	SI3	igneous	3	0.0018125	5231.32	-215.775
103	1030_BoeSite22_chimpstone_3_AKG.wav	throw117	three	ASTPAR	par exc	155	trunk	no	chimpstoneG	laterite	3.25	0.00397917	4466.35	-243.343
104	1030_BoeSite22_chimpstone_4_AKG.wav	throw118	four	ASTPAR	par exc	155	trunk	no	chimpstoneG	laterite	3.25	0.0038125	5717.89	-163.43
105	1031_BoeSite23_SI2_3_AKG.wav	throw119	three	Boto2	det sen	130	trunk	no	SI2	laterite	3	0.000770833	4666.11	-84.2794
106	1031_BoeSite23_SI2_4_AKG.wav	throw120	four	Boto2	det sen	130	trunk	no	SI2	laterite	3	0.00239583	4444.75	-122.826
107	1031_BoeSite23_SI3_4_AKG.wav	throw121	four	Boto2	det sen	130	trunk	no	SI3	igneous	3	0.001875	2831.96	-100.108
108	1032_BoeSite24_SI2_3_AKG.wav	throw122	three	Kai2	kha sen	80	trunk	no	SI2	laterite	3	0.00279167	6870.81	-126.258
109	1032_BoeSite24_SI2_4_AKG.wav	throw123	four	Kai2	kha sen	80	trunk	no	SI2	laterite	3	0.000666667	7646.36	-114.914
110	1033_BoeSite25_SI2_3_AKG.wav	throw124	three	ASTBANIOLD	pte eri	60	buttress	yes	SI2	laterite	3	0.00370833	1373.79	-106.625
111	1033_BoeSite25_SI2_4_AKG.wav	throw125	four	ASTBANIOLD	pte eri	60	buttress	yes	SI2	laterite	3	0.00275	1191.68	-104.351
112	1033_BoeSite25_SI3_3_AKG.wav	throw126	three	ASTBANIOLD	pte eri	60	buttress	yes	SI3	igneous	3	0.0025	1264.79	-110.594
113	1034_BoeSite25_SI2_3_AKG.wav	throw127	three	ASTBANIOLD	pte eri	60	trunk	yes	SI2	laterite	3	0.00158333	2645.61	-109.33
114	1034_BoeSite25_SI2_4_AKG.wav	throw128	four	ASTBANIOLD	pte eri	60	trunk	yes	SI2	laterite	3	0.0016875	4365.89	-110.653
115	1034_BoeSite25_SI3_3_AKG.wav	throw129	three	ASTBANIOLD	pte eri	60	trunk	yes	SI3	igneous	3	0.00179167	3611.93	-79.4834
116	1035_BoeSite26_SI2_3_AKG.wav	throw130	three	BOMSINGLETHROW	bom cos	65	buttress	yes	SI2	laterite	3	0.0040625	3105.59	-121.12
117	1035_BoeSite26_SI3_3_AKG.wav	throw131	three	BOMSINGLETHROW	bom cos	65	buttress	yes	SI3	igneous	3	0.00391667	1962.12	-93.7272
118	1035_BoeSite26_SI3_4_AKG.wav	throw132	four	BOMSINGLETHROW	bom cos	65	buttress	yes	SI3	igneous	3	0.00379167	2244.52	-123.041
119	1036_BoeSite27_SI2_3_AKG.wav	throw133	three	CROSSAST	cro feb	28	trunk	yes	SI2	laterite	3	0.00452083	1995.65	-82.646
120	1036_BoeSite27_SI2_4_AKG.wav	throw134	four	CROSSAST	cro feb	28	trunk	yes	SI2	laterite	3	0.0014375	1540.93	-74.4252
121	1036_BoeSite27_SI3_3_AKG.wav	throw135	three	CROSSAST	cro feb	28	trunk	yes	SI3	igneous	3	0.00141667	1838.19	-90.3225
122	1036_BoeSite27_SI3_4_AKG.wav	throw136	four	CROSSAST	cro feb	28	trunk	yes	SI3	igneous	3	0.00120833	1775.21	-86.5176
123	1037_BoeSite27B_SI2_3_AKG.wav	throw137	three	CROSSAST	cro feb	28	hollow	yes	SI2	laterite	3	0.0014375	3773.06	-85.8643
124	1037_BoeSite27B_SI2_4_AKG.wav	throw138	four	CROSSAST	cro feb	28	hollow	yes	SI2	laterite	3	0.0021875	4521.83	-72.4936
125	1037_BoeSite27B_SI3_3_AKG.wav	throw139	three	CROSSAST	cro feb	28	hollow	yes	SI3	igneous	3	0.00510417	4907.62	-121.156
